# Supplementary material
Source: Springer Nature journal article supplement (https://www.springermedizin.de/resource/supplementary/12985_2014_2483_MOESM4_ESM.pdf/9606846)

**PB2, PB1, PA & HA:**

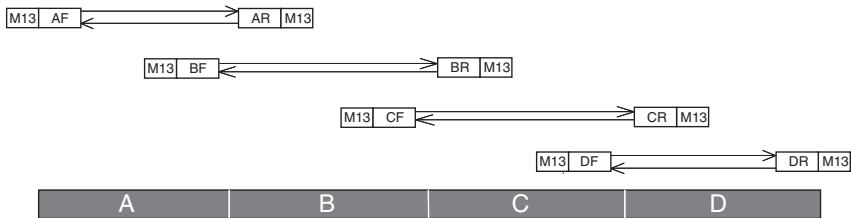

**NP & NA:**

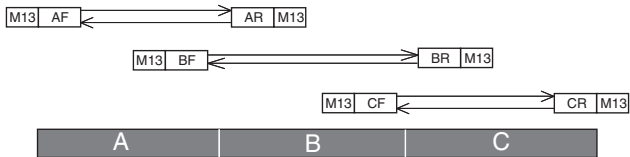

**M & NS:**

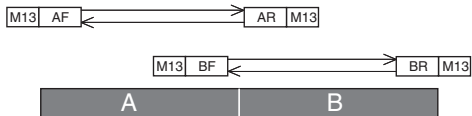

Supplement: MOESM4 [file 9606846]
